# Supplementary material for: The ModelSEED Biochemistry Database for the integration of metabolic annotations and the reconstruction, comparison and analysis of metabolic models for plants, fungi and microbes
Source: PubMed Central journal article supplement — Nucleic Acids Res. 2020 Sep 28;49(D1):D575–88. doi: 10.1093/nar/gkaa746 (PMC7778927; doi:10.1093/nar/gkaa746), 2020-09-28
Supplement: gkaa746_supplemental_file.pdf [file gkaa746_supplemental_file.pdf]

**Supporting Table S1: Sources of biochemistry integrated into PlantSEED**

| Database/Model | Species                            | Owner/Reference                       | Date / Version | Number of Compounds | Number of Reactions |
|----------------|------------------------------------|---------------------------------------|----------------|---------------------|---------------------|
| KEGG           | N/A                                | KEGG (1, 2)                           | 12/03/18       | 17,793              | 14,039              |
| MetaCyc        | N/A                                | PathwayTools (3)                      | 22.5           | 19,172              | 27,414              |
| EcoCyc         | <i>Escherichia coli</i>            | PathwayTools (3)                      | 16.1           | 3,355               | 2,411               |
| PlantCyc       | N/A                                | PMN (4, 5)                            | 7.0            | 3,919               | 4,436               |
| AraCyc         | <i>Arabidopsis thaliana</i>        | PMN (5)                               | 10.0           | 4,229               | 4,008               |
| PoplarCyc      | <i>Populus trichocarpa</i>         | PMN (4)                               | 4.0            | 2,318               | 2,301               |
| SoyCyc         | <i>Glycine max</i>                 | PMN                                   | 2.0            | 2,796               | 2,657               |
| ChlamyCyc      | <i>Chlamydomonas reinhardtii</i>   | PMN                                   | 03/03/10       | 1,718               | 1,875               |
| BrachyCyc      | <i>Brachypodium distachyon</i>     | Gramene (6, 7)                        | 2.0            | 2,348               | 3,104               |
| MaizeCyc       | <i>Zea mays</i>                    | Gramene (8)                           | 2.0            | 2,219               | 2,358               |
| RiceCyc        | <i>Oryza sativa</i>                | Gramene (9)                           | 2.0.1          | 1,859               | 1,955               |
| SorghumCyc     | <i>Sorghum bicolor</i>             | Gramene (6, 7)                        | 1.0.1          | 1,773               | 1,873               |
| iAF1260        | <i>Escherichia coli</i>            | Feist <i>et al.</i> (2007) (10)       |                | 1,041               | 2,064               |
| iAF692         | <i>Methanosarcina barkeri</i>      | Feist <i>et al.</i> (2006) (11)       |                | 562                 | 613                 |
| iIN800         | <i>Saccharomyces cerevisiae</i>    | Nookaew <i>et al.</i> (2008) (12)     |                | 683                 | 1,053               |
| iJR904         | <i>Escherichia coli</i>            | Reed <i>et al.</i> (2003) (13)        |                | 629                 | 921                 |
| iMA945         | <i>Salmonella spp.</i>             | AbuOun <i>et al.</i> (2009) (14)      |                | 1,032               | 1,960               |
| iMM904         | <i>Saccharomyces cerevisiae</i>    | Mo <i>et al.</i> (2009) (15)          |                | 712                 | 1,401               |
| iRR1083        | <i>Salmonella typhimurium</i> LT2  | Raghunathan <i>et al.</i> (2009) (16) |                | 759                 | 1,086               |
| iSB619         | <i>Staphylococcus aureus</i> N315  | Becker <i>et al.</i> (2005) (17)      |                | 614                 | 639                 |
| iSO783         | <i>Shewanella oneidensis</i> MR-1  | Pinchuk <i>et al.</i> (2010) (18)     |                | 634                 | 774                 |
| iAbaylyiv4     | <i>Acinetobacter baylyi</i> ADP1   | Durot <i>et al.</i> (2008) (19)       |                | 699                 | 867                 |
| *              | <i>Bacillus subtilis</i>           | Goelzer <i>et al.</i> (2008) (20)     |                | 475                 | 504                 |
| iGT196         | <i>Buchnera aphidicola</i>         | Thomas <i>et al.</i> (2009) (21)      |                | 740                 | 210                 |
| iIT341         | <i>Helicobacter pylori</i>         | Thiele <i>et al.</i> (2005) (22)      |                | 411                 | 473                 |
| iJN746         | <i>Pseudomonas putida</i> KT2440   | Nogales <i>et al.</i> (2008) (23)     |                | 706                 | 915                 |
| iMO1056        | <i>Pseudomonas aeruginosa</i> PAO1 | Oberhardt <i>et al.</i> (2008) (24)   |                | 750                 | 864                 |
| iND750         | <i>Saccharomyces cerevisiae</i>    | Duarte <i>et al.</i> (2004) (25)      |                | 650                 | 1,038               |

|         |                                         |                                       |       |       |
|---------|-----------------------------------------|---------------------------------------|-------|-------|
| iNJ661  | <i>Mycobacterium tuberculosis</i> H37Rv | Jamshidi & Palsson (2007) (26)        | 761   | 951   |
| iPS189  | <i>Mycoplasma genitalium</i>            | Suthers <i>et al.</i> (2009) (27)     | 277   | 262   |
| iRS1563 | <i>Zea mays</i>                         | Saha <i>et al.</i> (2011) (28)        | 1,812 | 1,949 |
| iRS1597 | <i>Arabidopsis thaliana</i>             | Saha <i>et al.</i> (2011) (28)        | 1,759 | 1,837 |
| iYO844  | <i>Bacillus subtilis</i>                | Oh <i>et al.</i> (2007) (29)          | 776   | 1,016 |
| *       | <i>Chlamydomonas reinhardtii</i>        | Boyle & Morgan (2009) (30)            | 266   | 485   |
| *       | <i>Chlamydomonas reinhardtii</i>        | Manichaikul <i>et al.</i> (2009) (31) | 124   | 238   |
| *       | <i>Chlamydomonas reinhardtii</i>        | Chang <i>et al.</i> (2011) (32)       | 1,164 | 2,084 |
| C4GEM   | <i>Zea mays</i>                         | D'al Molin <i>et al.</i> (2010) (33)  | 1,207 | 1,227 |
| *       | <i>Arabidopsis thaliana</i>             | Mintz-Oron <i>et al.</i> (2012) (34)  | 1,181 | 3,382 |
| *       | <i>Arabidopsis thaliana</i>             | Poolman <i>et al.</i> (2009) (35)     | 1,224 | 1,354 |
| AraGEM  | <i>Arabidopsis thaliana</i>             | D'al Molin <i>et al.</i> (2010) (36)  | 1,546 | 1,590 |
| AlgaGEM | <i>Chlamydomonas reinhardtii</i>        | D'al Molin <i>et al.</i> (2011) (37)  | 1,662 | 1,713 |

The numbers of compounds and reactions are listed for each source *after* integration, and may not reflect the numbers seen in the literature. In addition, the number of reactions includes compartmentalized reactions, which may be duplicates. \*No unique identifier for these models was described in the literature.

1. Kanehisa M & Goto S (2000) KEGG: kyoto encyclopedia of genes and genomes. *Nucleic Acids Res* 28(1):27-30.
2. Kanehisa M, Goto S, Sato Y, Furumichi M, & Tanabe M (2012) KEGG for integration and interpretation of large-scale molecular data sets. *Nucleic Acids Res* 40(Database issue):D109-114.
3. Caspi R, *et al.* (2012) The MetaCyc database of metabolic pathways and enzymes and the BioCyc collection of pathway/genome databases. *Nucleic Acids Res* 40(Database issue):D742-753.
4. Zhang P, *et al.* (2010) Creation of a genome-wide metabolic pathway database for *Populus trichocarpa* using a new approach for reconstruction and curation of metabolic pathways for plants. *Plant Physiol* 153(4):1479-1491.
5. Mueller LA, Zhang P, & Rhee SY (2003) AraCyc: a biochemical pathway database for *Arabidopsis*. *Plant Physiol* 132(2):453-460.
6. Jaiswal P (2011) Gramene database: a hub for comparative plant genomics. *Methods Mol Biol* 678:247-275.
7. Youens-Clark K, *et al.* (2011) Gramene database in 2010: updates and extensions. *Nucleic Acids Res* 39(Database issue):D1085-1094.
8. Monaco MK, *et al.* (2013) Maize Metabolic Network Construction and Transcriptome Analysis. *Plant Gen.* 6(1):-.
9. Dharmawardhana P, *et al.* (2013) A genome scale metabolic network for rice and accompanying analysis of tryptophan, auxin and serotonin biosynthesis regulation under biotic stress. *Rice (N Y)* 6(1):15.

10. Feist AM, *et al.* (2007) A genome-scale metabolic reconstruction for Escherichia coli K-12 MG1655 that accounts for 1260 ORFs and thermodynamic information. *Mol Syst Biol* 3:121.
11. Feist AM, Scholten JC, Palsson BO, Brockman FJ, & Ideker T (2006) Modeling methanogenesis with a genome-scale metabolic reconstruction of Methanosarcina barkeri. *Mol Syst Biol* 2:2006 0004.
12. Nookaew I, *et al.* (2008) The genome-scale metabolic model iIN800 of Saccharomyces cerevisiae and its validation: a scaffold to query lipid metabolism. *BMC Syst Biol* 2(1):71.
13. Reed JL, Vo TD, Schilling CH, & Palsson BO (2003) An expanded genome-scale model of Escherichia coli K-12 (iJR904 GSM/GPR). *Genome Biol* 4(9):R54.
14. AbuOun M, *et al.* (2009) Genome scale reconstruction of a Salmonella metabolic model: comparison of similarity and differences with a commensal Escherichia coli strain. *J Biol Chem* 284(43):29480-29488.
15. Mo ML, Palsson BO, & Herrgard MJ (2009) Connecting extracellular metabolomic measurements to intracellular flux states in yeast. *BMC Syst Biol* 3:37.
16. Raghunathan A, Reed J, Shin S, Palsson B, & Daefler S (2009) Constraint-based analysis of metabolic capacity of Salmonella typhimurium during host-pathogen interaction. *BMC Syst Biol* 3:38.
17. Becker SA & Palsson BO (2005) Genome-scale reconstruction of the metabolic network in Staphylococcus aureus N315: an initial draft to the two-dimensional annotation. *BMC Microbiol* 5:8.
18. Pinchuk GE, *et al.* (2010) Constraint-based model of Shewanella oneidensis MR-1 metabolism: a tool for data analysis and hypothesis generation. *PLoS Comput Biol* 6(6):e1000822.
19. Durot M, *et al.* (2008) Iterative reconstruction of a global metabolic model of Acinetobacter baylyi ADP1 using high-throughput growth phenotype and gene essentiality data. *BMC Syst Biol* 2:85.
20. Goelzer A, *et al.* (2008) Reconstruction and analysis of the genetic and metabolic regulatory networks of the central metabolism of Bacillus subtilis. *BMC Syst Biol* 2:20.
21. Thomas GH, *et al.* (2009) A fragile metabolic network adapted for cooperation in the symbiotic bacterium Buchnera aphidicola. *BMC Syst Biol* 3:24.
22. Thiele I, Vo TD, Price ND, & Palsson BO (2005) Expanded metabolic reconstruction of Helicobacter pylori (iIT341 GSM/GPR): an in silico genome-scale characterization of single- and double-deletion mutants. *J Bacteriol* 187(16):5818-5830.
23. Nogales J, Palsson BO, & Thiele I (2008) A genome-scale metabolic reconstruction of Pseudomonas putida KT2440: iJN746 as a cell factory. *BMC Syst Biol* 2:79.
24. Oberhardt MA, Puchalka J, Fryer KE, Martins dos Santos VA, & Papin JA (2008) Genome-scale metabolic network analysis of the opportunistic pathogen Pseudomonas aeruginosa PAO1. *J Bacteriol* 190(8):2790-2803.
25. Duarte NC, Herrgard MJ, & Palsson BO (2004) Reconstruction and validation of Saccharomyces cerevisiae iND750, a fully compartmentalized genome-scale metabolic model. *Genome Res* 14(7):1298-1309.
26. Jamshidi N & Palsson BO (2007) Investigating the metabolic capabilities of Mycobacterium tuberculosis H37Rv using the in silico strain iNJ661 and proposing alternative drug targets. *BMC Syst Biol* 1:26.
27. Suthers PF, *et al.* (2009) A genome-scale metabolic reconstruction of Mycoplasma genitalium, iPS189. *PLoS Comput Biol* 5(2):e1000285.
28. Saha R, Suthers PF, & Maranas CD (2011) Zea mays iRS1563: a comprehensive genome-scale metabolic reconstruction of maize metabolism. *PLoS One* 6(7):e21784.
29. Oh YK, Palsson BO, Park SM, Schilling CH, & Mahadevan R (2007) Genome-scale reconstruction of metabolic network in Bacillus subtilis based on high-throughput phenotyping and gene essentiality data. *J Biol Chem* 282(39):28791-28799.
30. Boyle NR & Morgan JA (2009) Flux balance analysis of primary metabolism in Chlamydomonas reinhardtii. *BMC Syst Biol* 3:4.
31. Manichaikul A, *et al.* (2009) Metabolic network analysis integrated with transcript verification for sequenced genomes. *Nat Methods* 6(8):589-592.

32. Chang RL, *et al.* (2011) Metabolic network reconstruction of Chlamydomonas offers insight into light-driven algal metabolism. *Mol Syst Biol* 7:518.
33. Dal'Molin CG, Quek LE, Palfreyman RW, Brumbley SM, & Nielsen LK (2010) C4GEM, a genome-scale metabolic model to study C4 plant metabolism. *Plant Physiol* 154(4):1871-1885.
34. Mintz-Oron S, *et al.* (2012) Reconstruction of Arabidopsis metabolic network models accounting for subcellular compartmentalization and tissue-specificity. *Proc Natl Acad Sci U S A* 109(1):339-344.
35. Poolman MG, Miguet L, Sweetlove LJ, & Fell DA (2009) A genome-scale metabolic model of Arabidopsis and some of its properties. *Plant Physiol* 151(3):1570-1581.
36. de Oliveira Dal'Molin CG, Quek LE, Palfreyman RW, Brumbley SM, & Nielsen LK (2010) AraGEM, a genome-scale reconstruction of the primary metabolic network in Arabidopsis. *Plant Physiol* 152(2):579-589.
37. Dal'Molin CG, Quek LE, Palfreyman RW, & Nielsen LK (2011) AlgaGEM--a genome-scale metabolic reconstruction of algae based on the Chlamydomonas reinhardtii genome. *BMC Genomics* 12 Suppl 4:S5.
